# Supplementary material for: Acceptability and potential impact on uptake of using different risk stratification approaches to determine eligibility for screening: A population‐based survey
Source: PubMed Central journal article supplement (PMC8077132; doi:10.1111/hex.13175), 2020-12-02

Appendix Figure 1

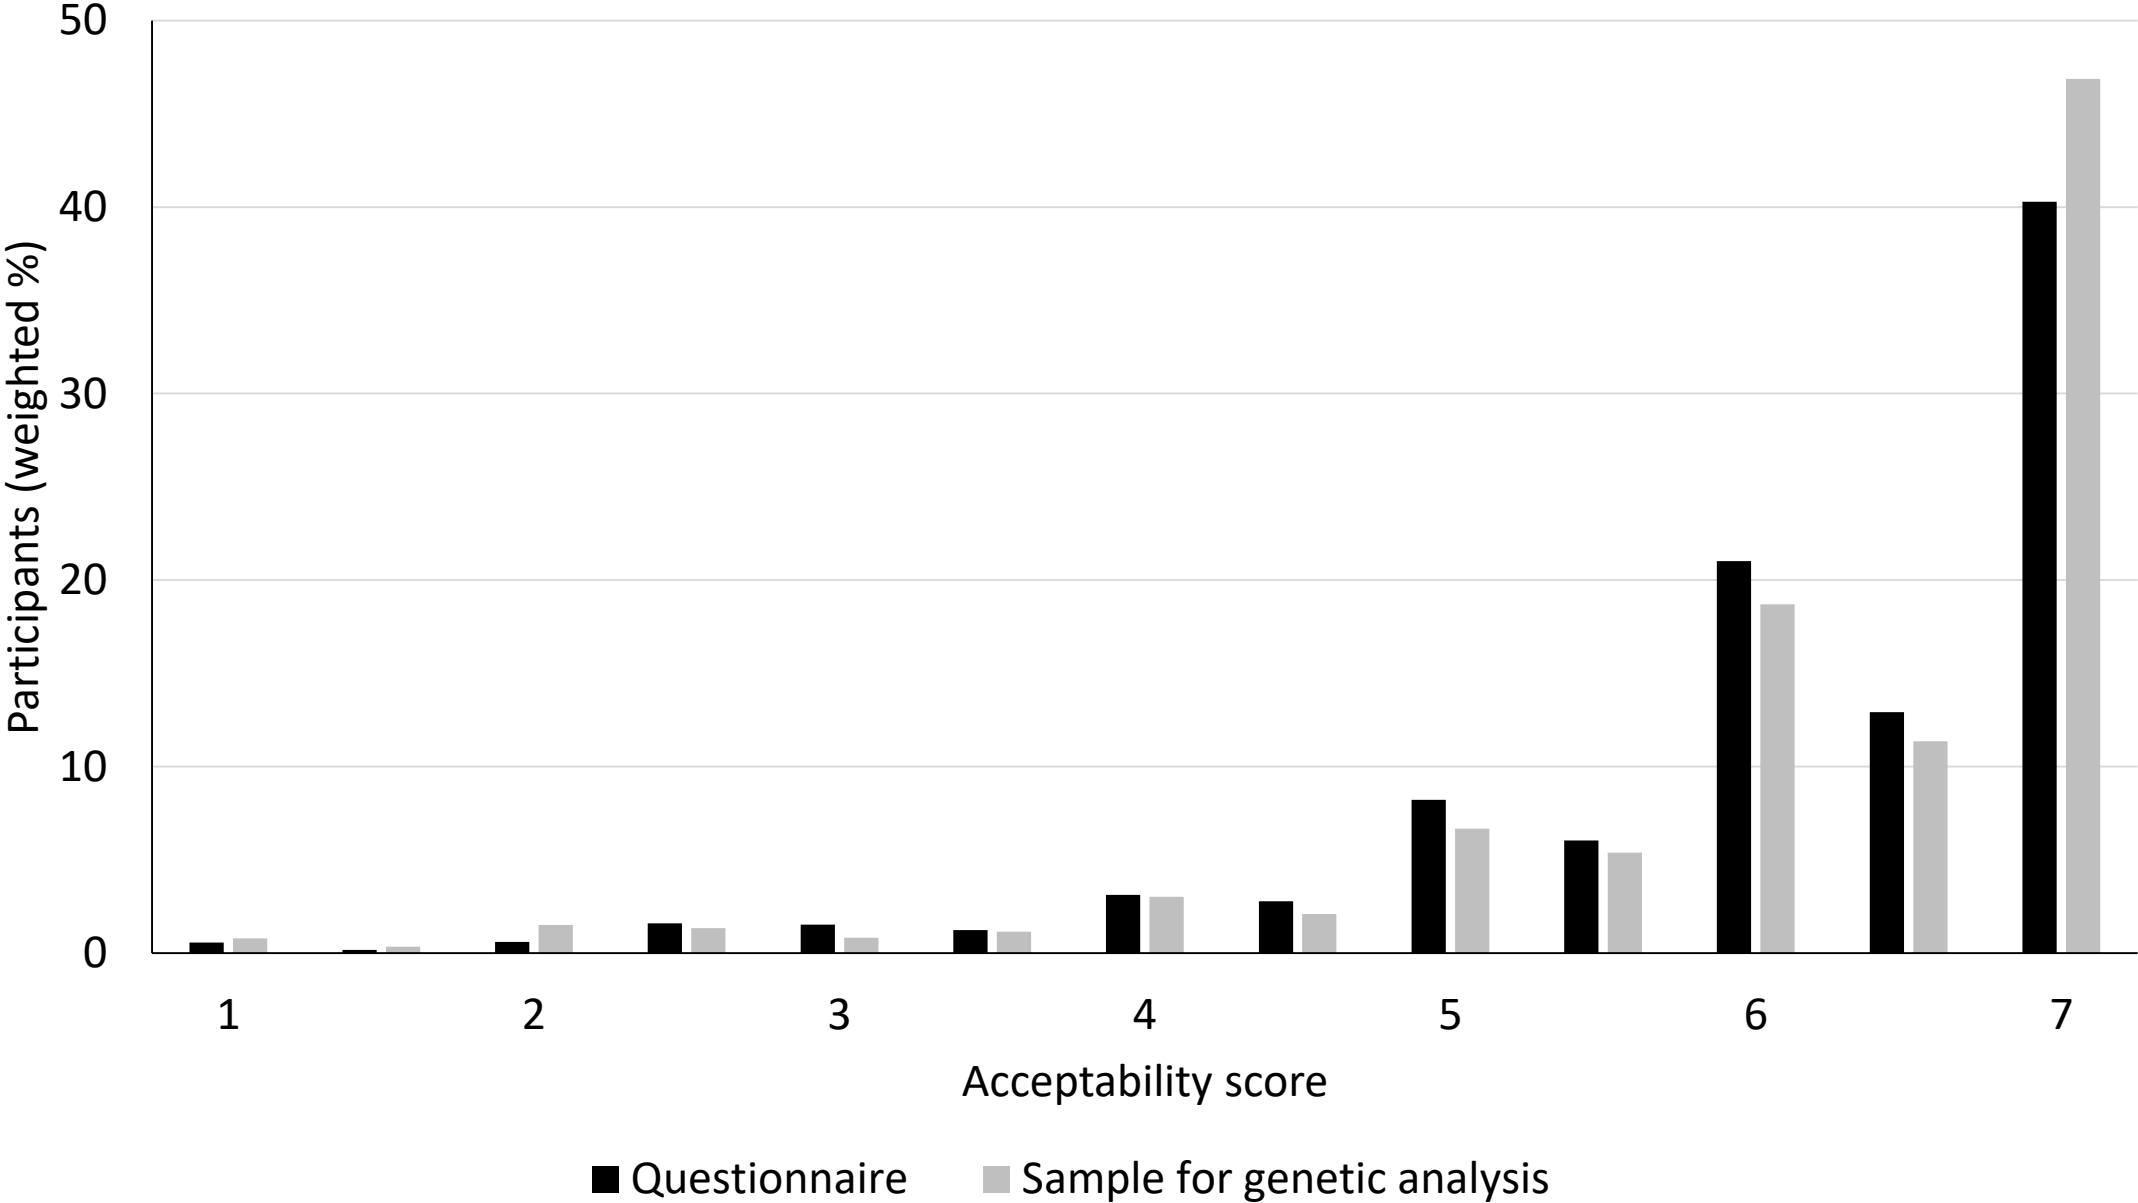

Supplement: HEX-24-341-s002.pdf [file HEX-24-341-s002.pdf]
